# Supplementary material for: An In Vitro Investigation of Cytotoxic Effects of InP/Zns Quantum Dots with Different Surface Chemistries
Source: MDPI journal article supplement (doi:10.3390/nano9020135), 2019-01-22
Supplement: s1 [file s1]

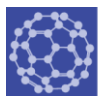

# An In Vitro Investigation of Cytotoxic Effects of InP/Zns Quantum Dots with Different Surface Chemistries

Deanna Ayupova <sup>1,2,3</sup>, Garima Dobhal <sup>1,2,3</sup>, Geoffry Laufersky <sup>1,2,3</sup>, Thomas Nann <sup>1,3,†</sup> and Renee V. Goreham <sup>1,2,3,\*</sup>

<sup>1</sup> MacDiarmid Institute for Advanced Materials and Nanotechnology, Wellington 6140, New Zealand; deanna.ayupova@vuw.ac.nz (D.A.); garima.dobhal@vuw.ac.nz (G.D.); geoffry.laufersky@vuw.ac.nz (G.L.); thomas.nann@newcastle.edu.au (T.N.)

<sup>2</sup> Centre for Biodiscovery, Victoria University of Wellington, Wellington 6012, New Zealand

<sup>3</sup> School of Chemical and Physical Sciences, Victoria University of Wellington, Wellington 6012, New Zealand

\* Correspondence: Renee.Goreham@vuw.ac.nz

† Current address: School of Mathematical and Physical Sciences, University of Newcastle, Newcastle 2304, Australia

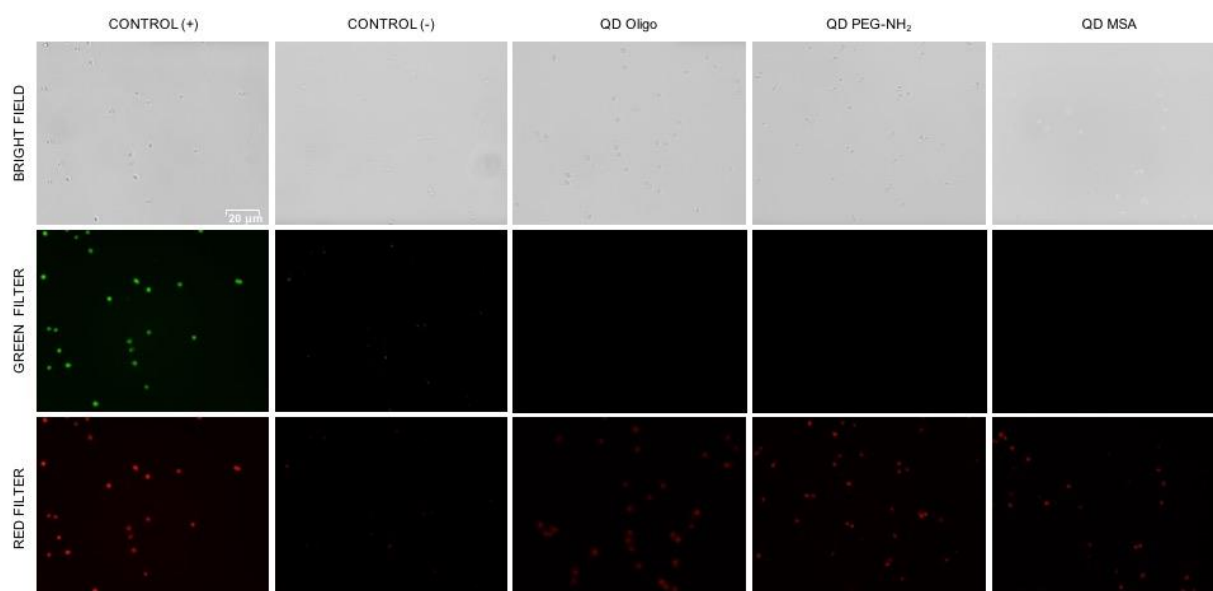

**Figure S1.** Data represents positive (induced with ROS inducer Pyocyanin) and negative (pre-treated with ROS inhibitor N-acetyl-L-cysteine) controls and QDs treated with 2x ROS/Superoxide Detection Mix. As a result, positive control exhibit both bright green and red fluorescence, negative control shows no significant green or red fluorescence upon induction, and QDs present only in red channel.

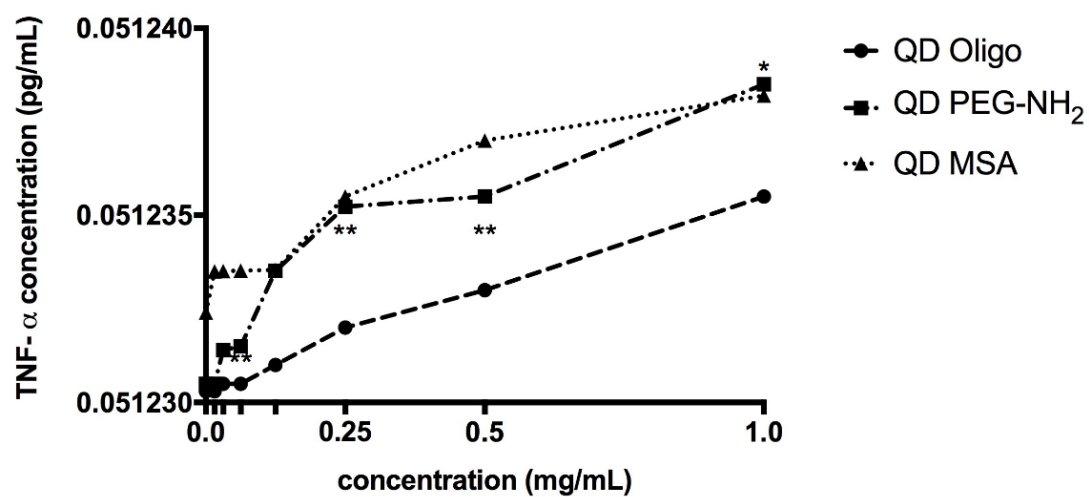

**Figure S2.** Representation of TNF $\alpha$  secretion on RAW 264.7 cells vs concentration, after treatments with QDs with ligands Oligo, PEG-NH<sub>2</sub> and MSA. Data represents mean SEM ( $n = 3$ ).
